# Supplementary material for: Essential Oils from Fruit and Vegetables, Aromatic Herbs, and Spices: Composition, Antioxidant, and Antimicrobial Activities
Source: MDPI journal article supplement (doi:10.3390/biology10111091), 2021-10-25
Supplement: s1 [file s1]

*Cinnamomum casia*

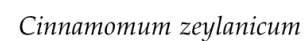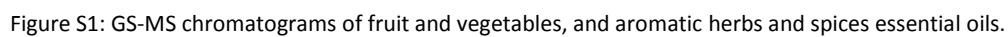

Scan El  
TIC  
1.02e6

100

16.02

15.24

10.85

10.74

19.70

23.74

7.00 8.02 8.90 9.62 10.85 13.74 15.24 15.54 15.86 16.02 16.61 18.00 18.50 19.12 19.70 22.64 23.74

AU

Time

oils.

*Rosmarinus officinalis*

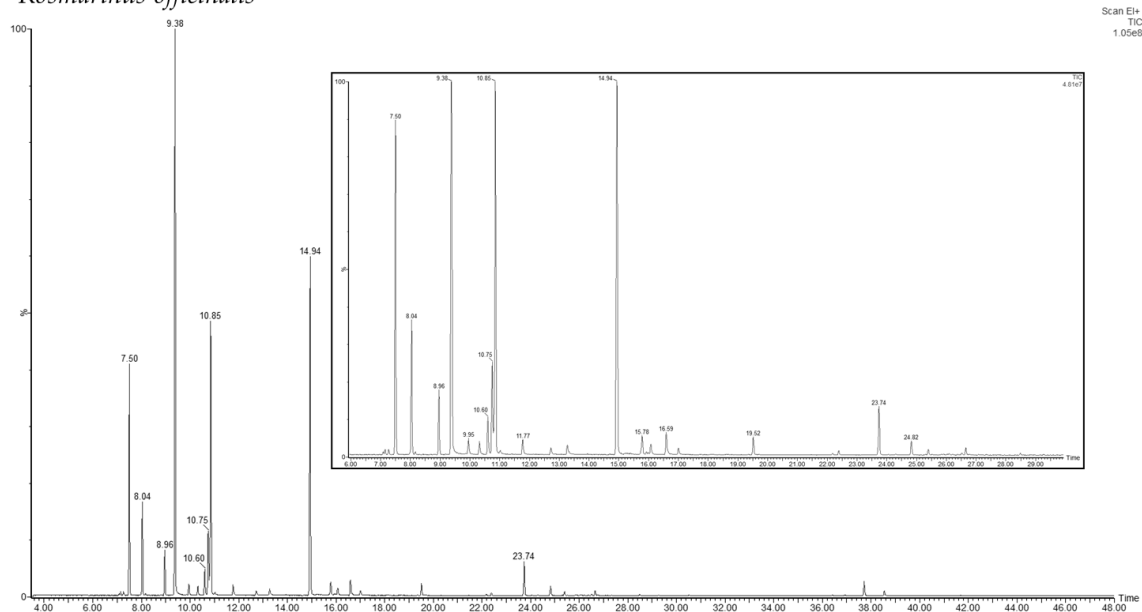

*Salvia lavandulifolia*

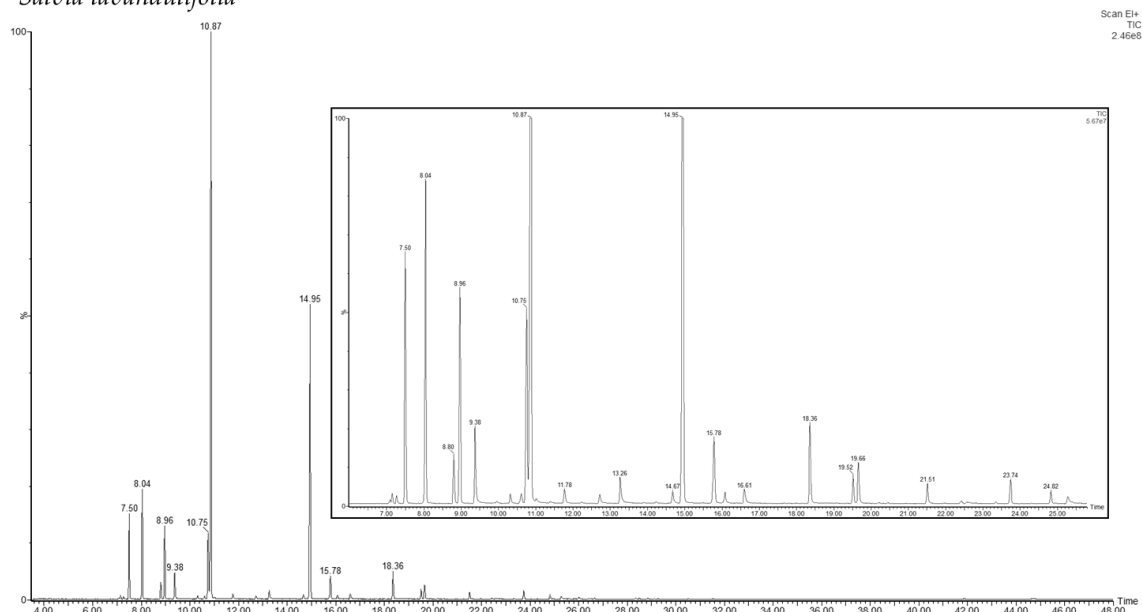

Figure S1 (continuation): GS-MS chromatograms of fruit and vegetables, and aromatic herbs and spices essential oils.

*Thymus vulgaris*

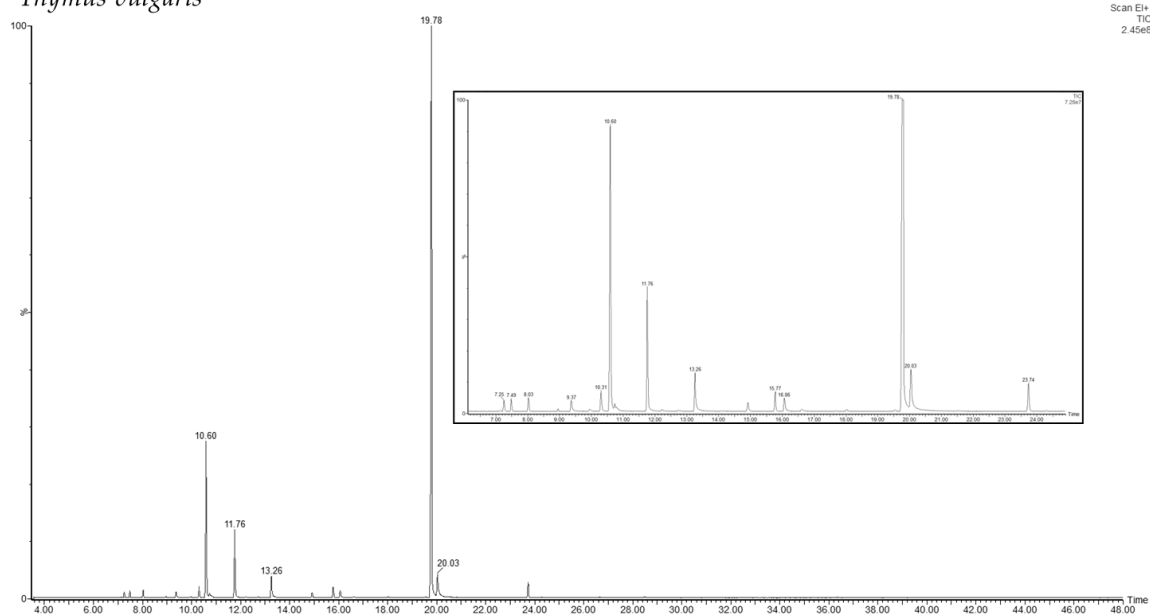

*Apium graveolens*

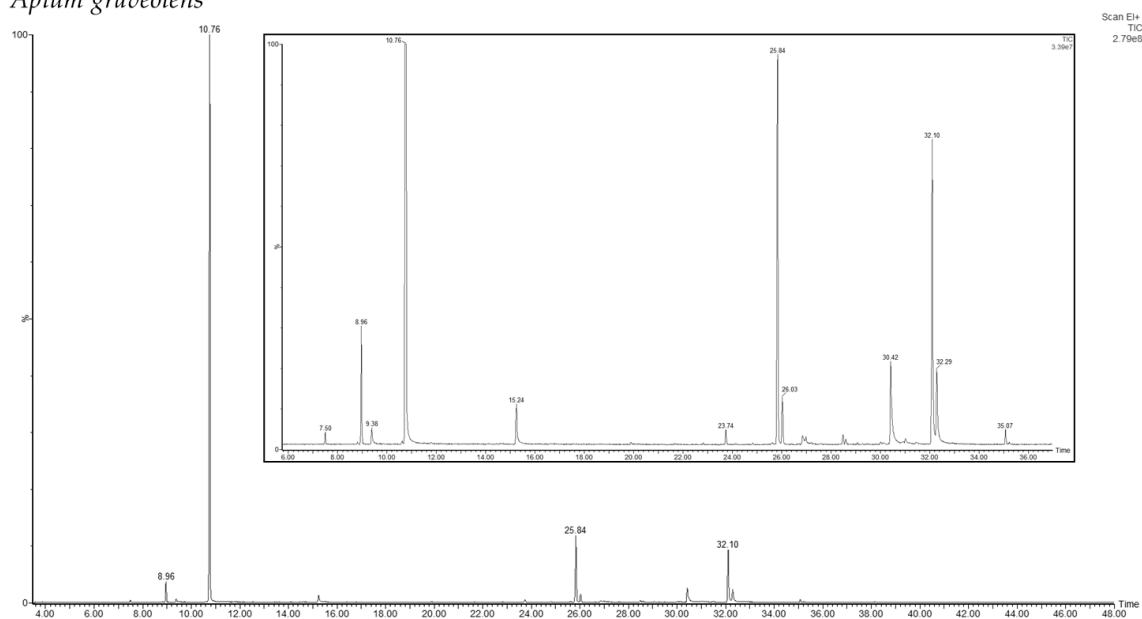

Figure S1 (continuation): GS-MS chromatograms of fruit and vegetables, and aromatic herbs and spices essential oils.

*Citrus limon*

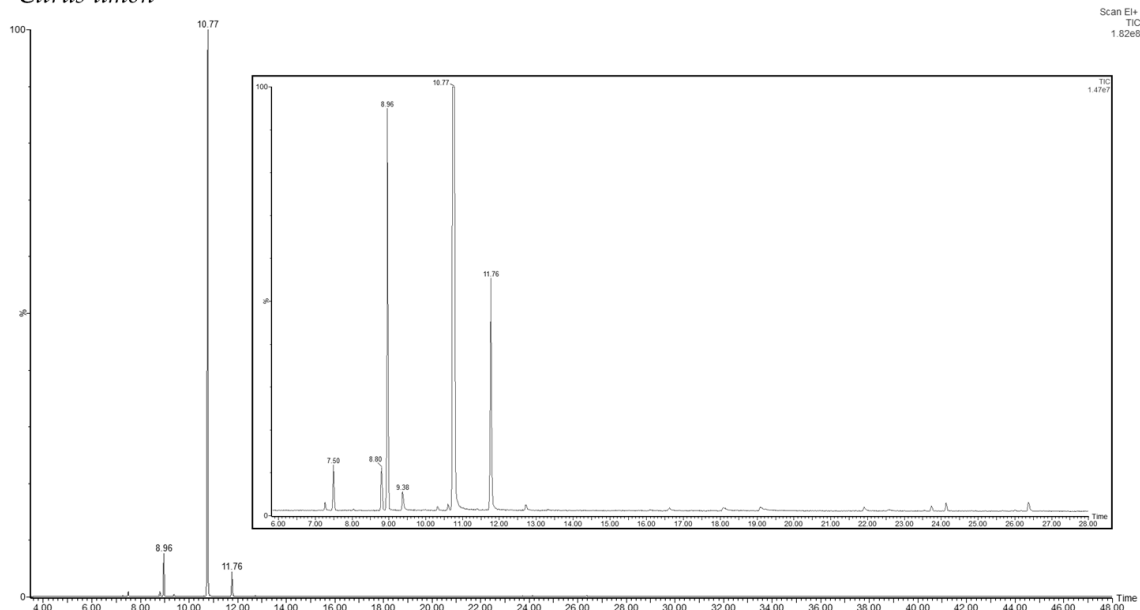

*Citrus paradisi*

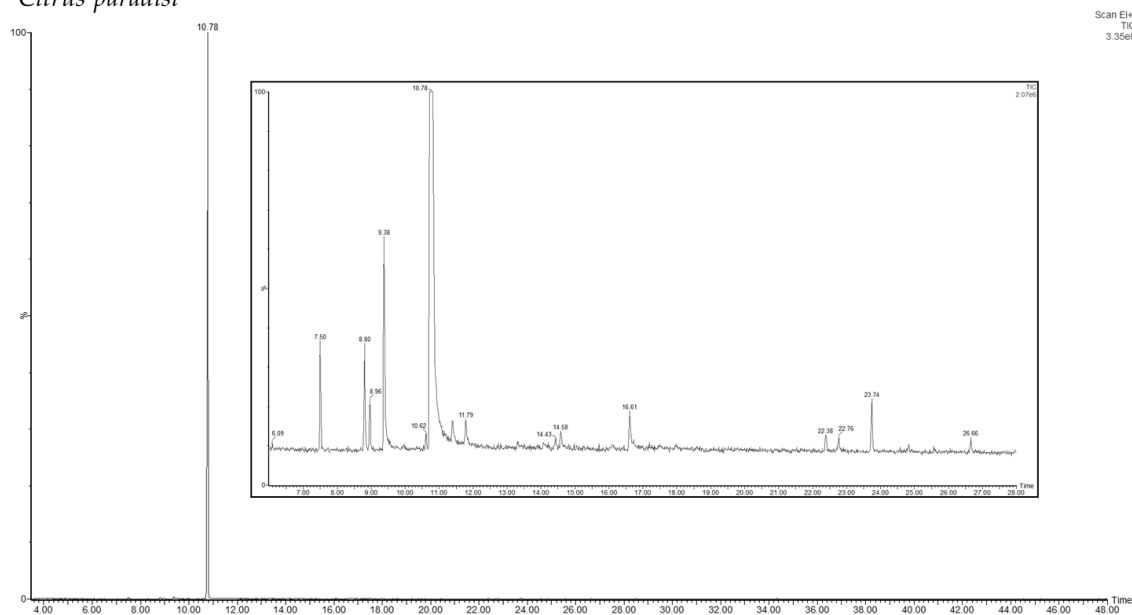

Figure S1 (continuation): GS-MS chromatograms of fruit and vegetables, and aromatic herbs and spices essential oils.

*Citrus reticulata*

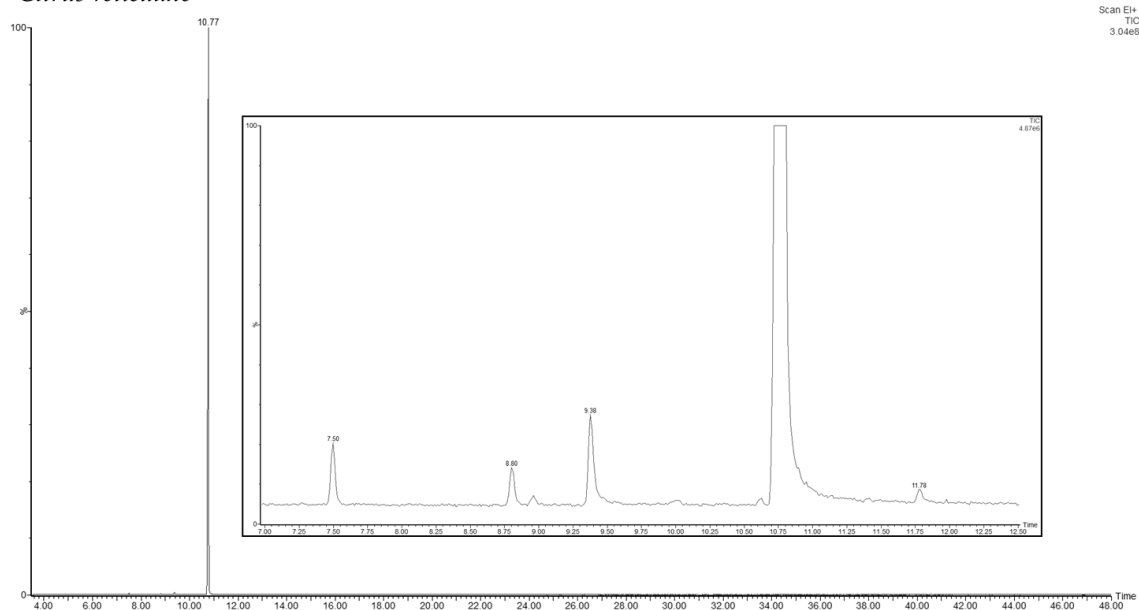

*Citrus sinensis*

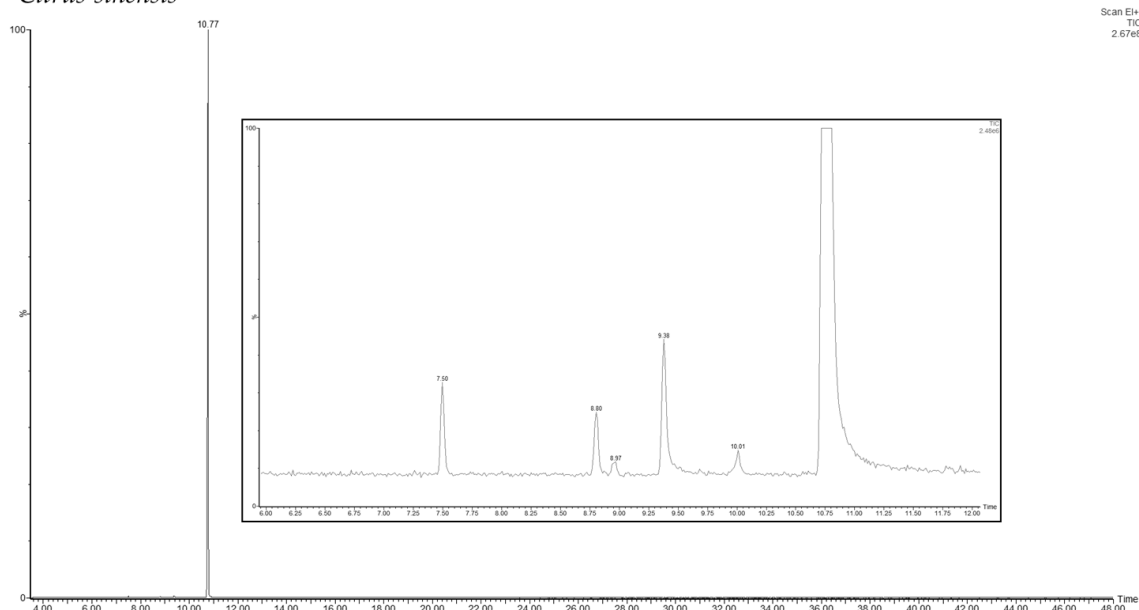

Figure S1 (continuation): GS-MS chromatograms of fruit and vegetables, and aromatic herbs and spices essential oils.

*Foeniculum vulgare*

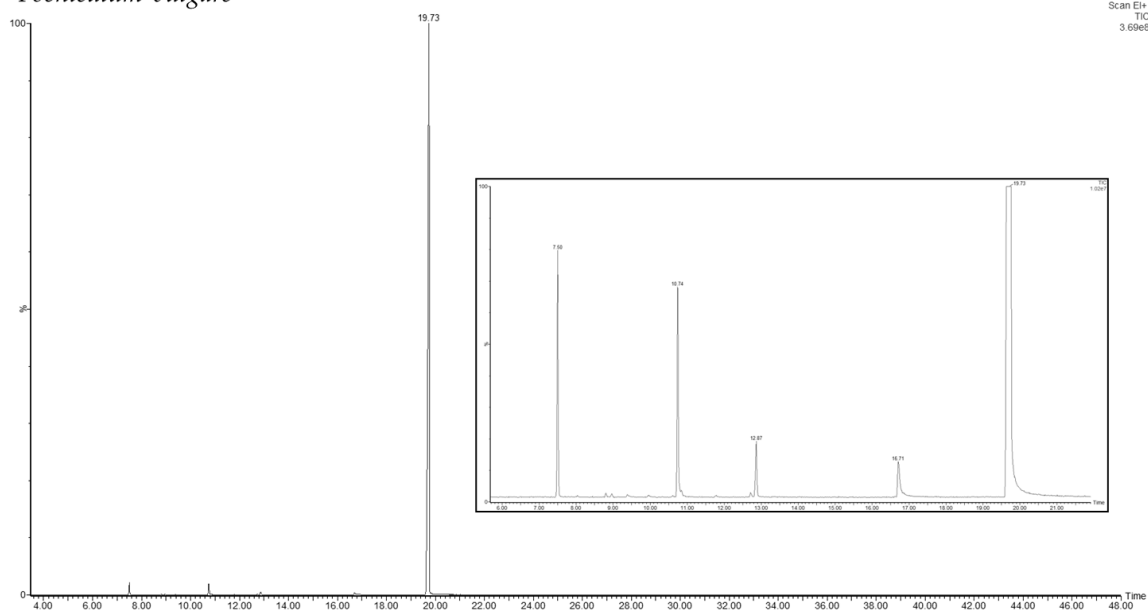

Figure S1 (continuation): GS-MS chromatograms of fruit and vegetables, and aromatic herbs and spices essential oils.
